# Supplementary material for: Spatiotemporal clustering of the epigenome reveals rules of dynamic gene regulation
Source: HighWire-hosted journal article supplement (doi:10.1101/gr.144949.112), 2012-10-02

A

Fold enrichment

|              | distal (2-3kbp) | proximal (1-2kbp) | core (<1kbp) | 5' UTR | exon | intron | 3' UTR | downsream (<1kbp) | downstream (1-2kbp) | downstream (2-3kbp) | distal intergenic |
|--------------|-----------------|-------------------|--------------|--------|------|--------|--------|-------------------|---------------------|---------------------|-------------------|
| 5-hmc, Day 0 | 1.00            | 1.03              | 1.02         | 1.00   | 2.96 | 1.25   | 1.95   | 1.69              | 1.25                | 1.04                | 0.68              |
| 5-hmc, Day 4 | 1.43            | 2.25              | 3.95         | 1.02   | 1.87 | 1.03   | 1.41   | 1.52              | 1.18                | 1.01                | 0.79              |
| 5-hmc, Day 6 | 1.23            | 1.78              | 3.18         | 1.00   | 1.68 | 1.09   | 1.27   | 1.28              | 1.06                | 1.00                | 0.80              |

B

Average profiles of 5-hmC around TSS

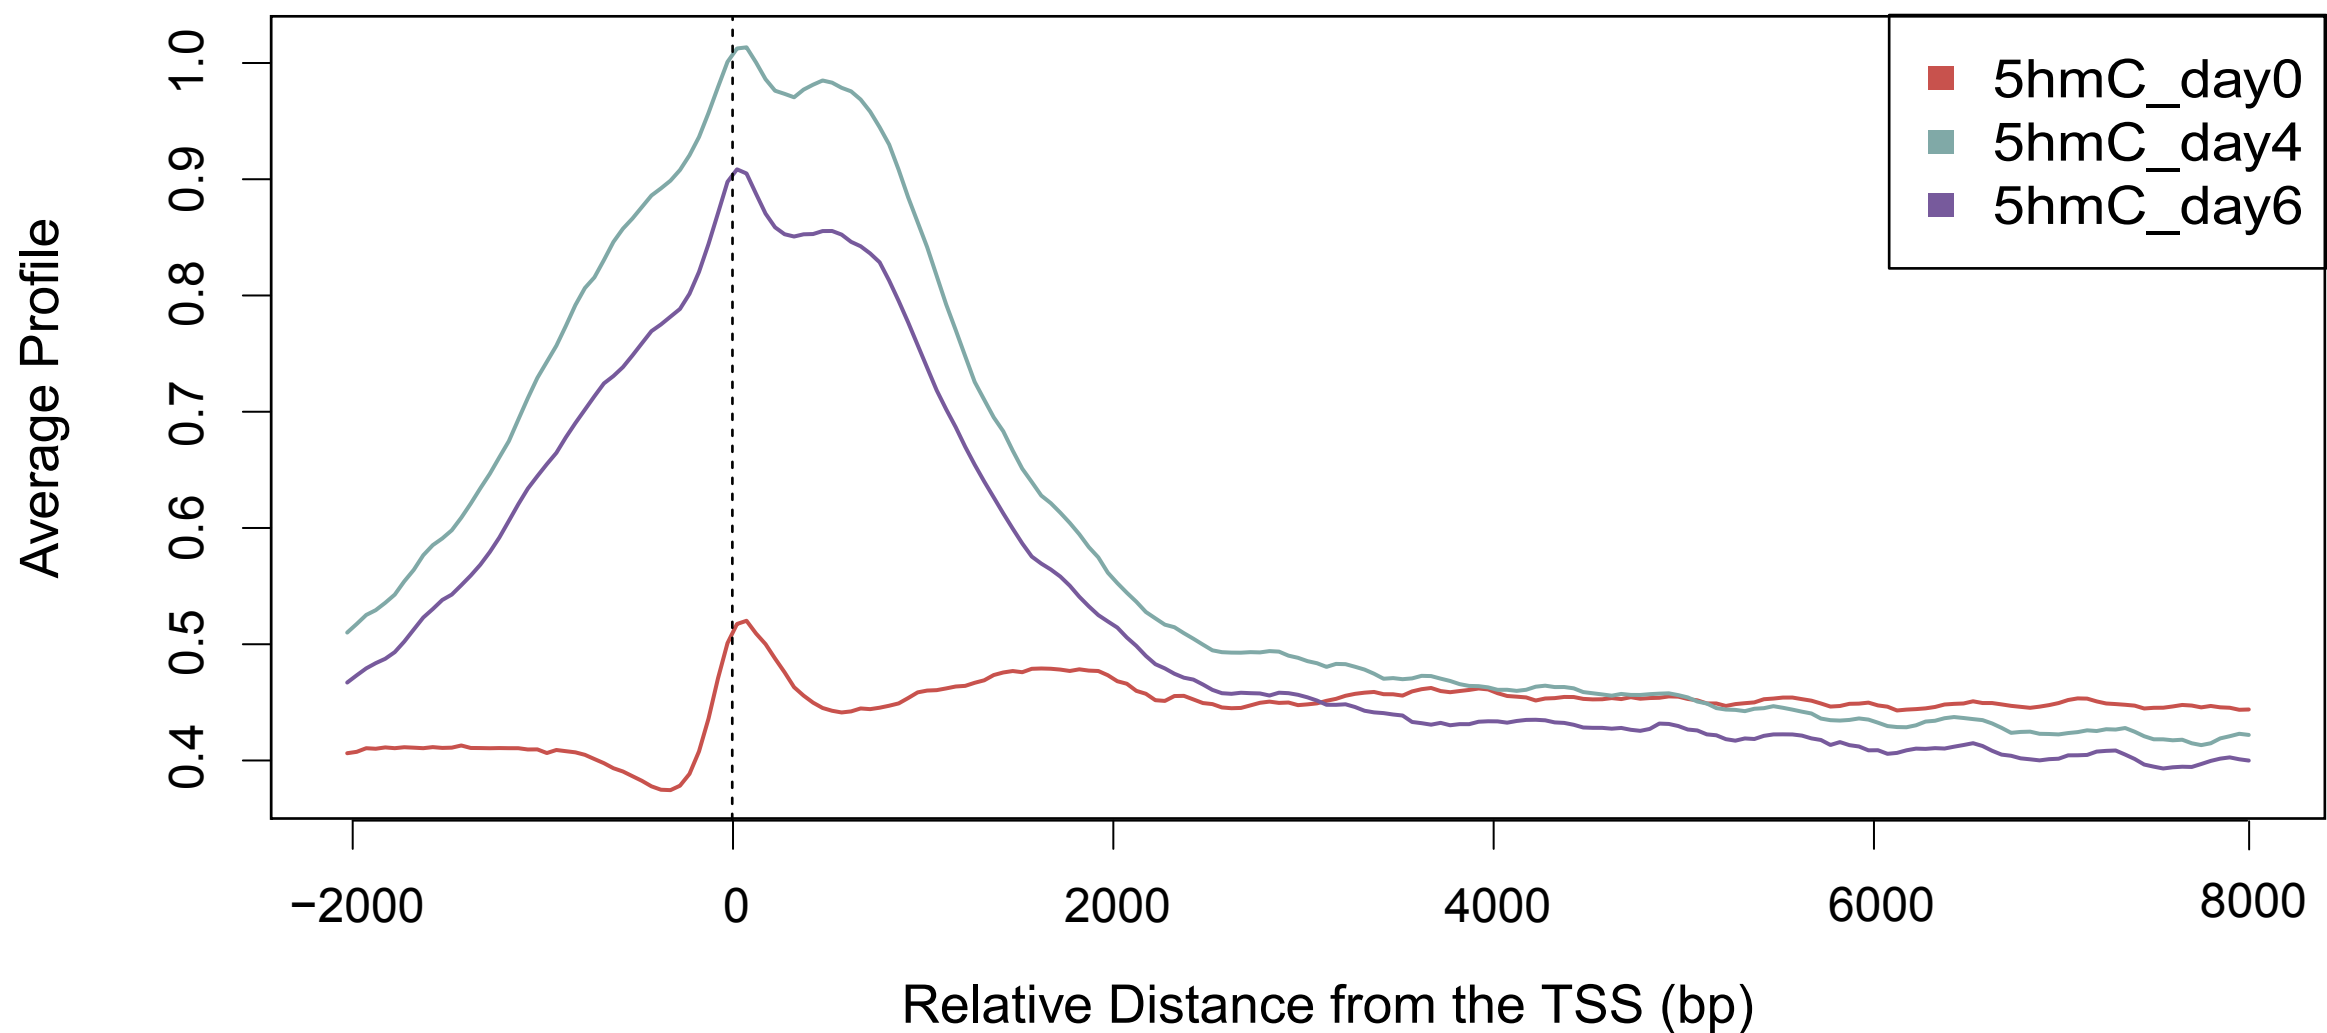

Supplement: Figure_S11.pdf [file Figure_S11.pdf]
