# Supplementary material for: Spatiotemporal clustering of the epigenome reveals rules of dynamic gene regulation
Source: HighWire-hosted journal article supplement (doi:10.1101/gr.144949.112), 2012-10-02

Day 0

Day 4

Day 6

A

5-mC (MeDIP) around the center of predicted promoter sites

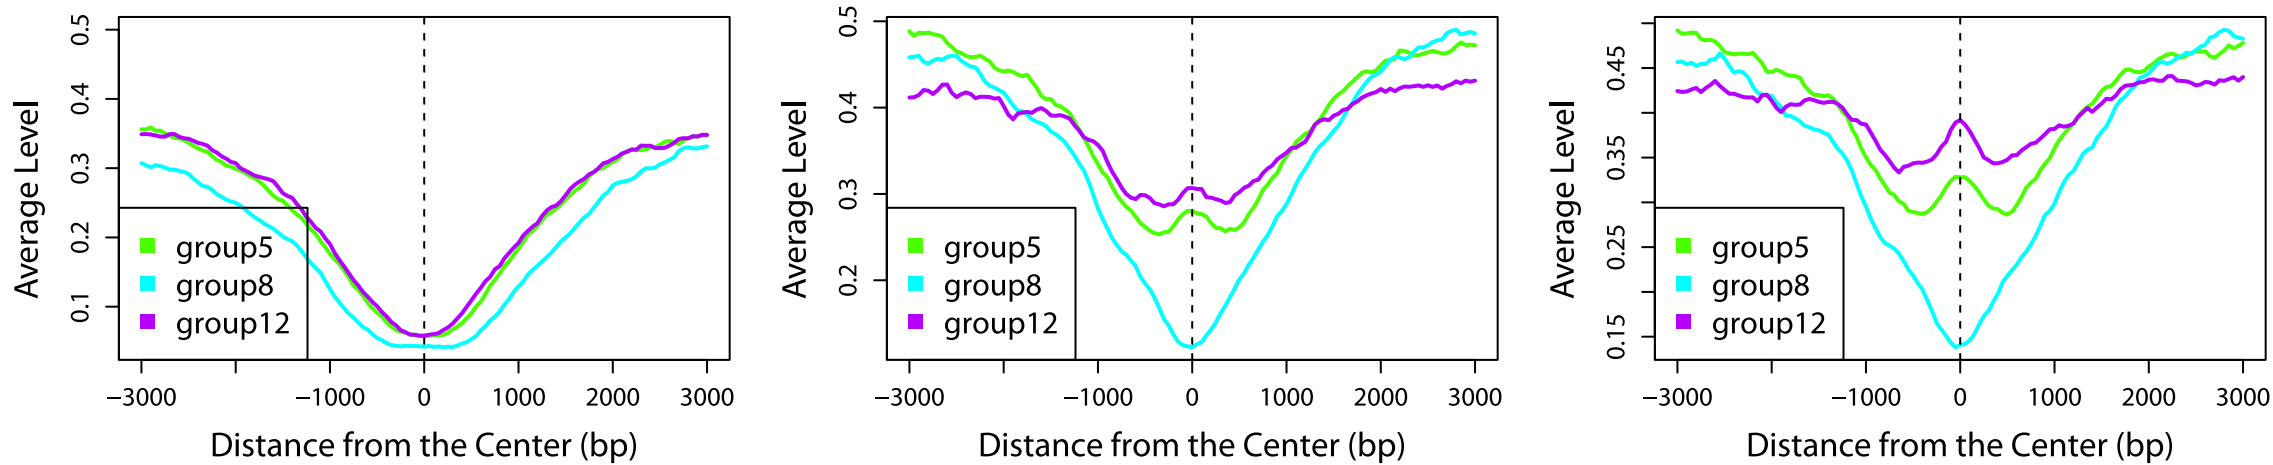

B

 $^u$ CpG (MRE) around the center of predicted promoter sites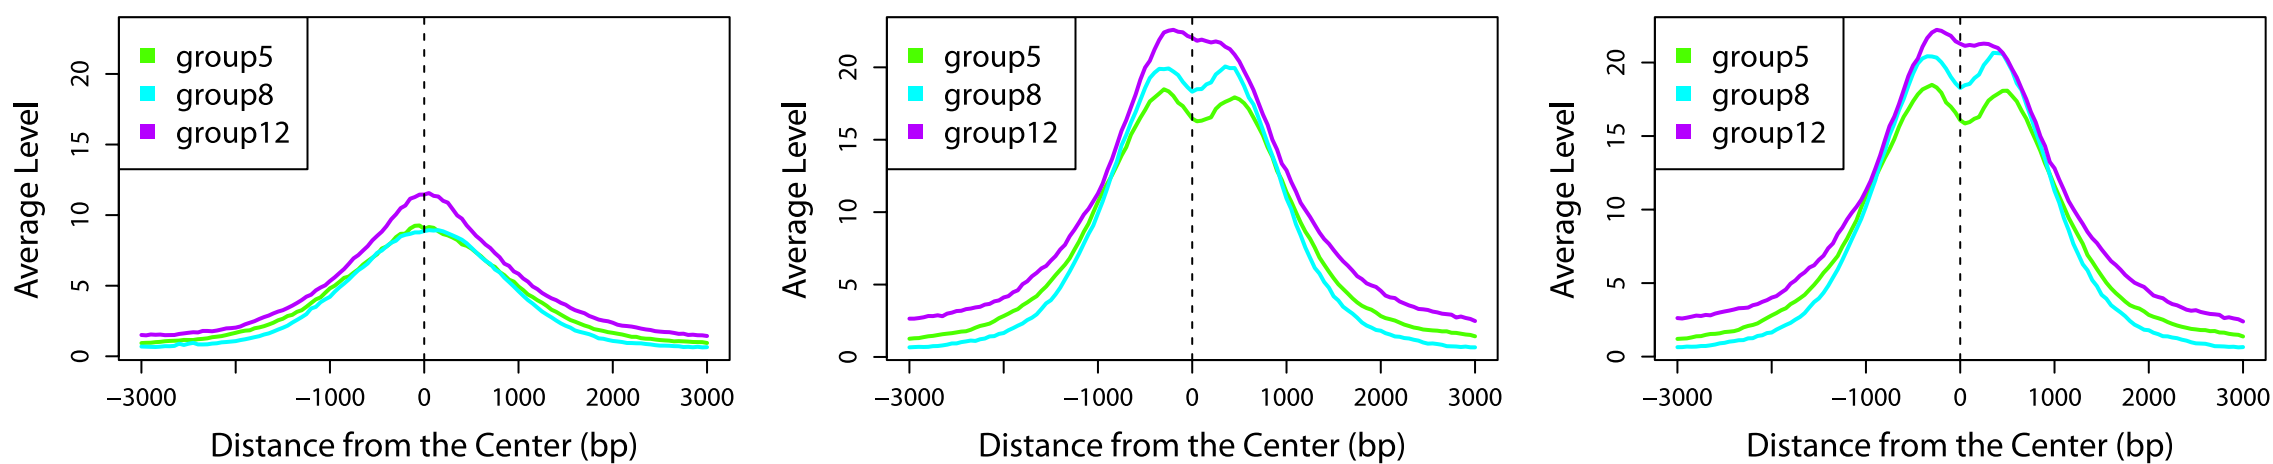

C

5-mC (MeDIP) around the center of predicted enhancer Sites

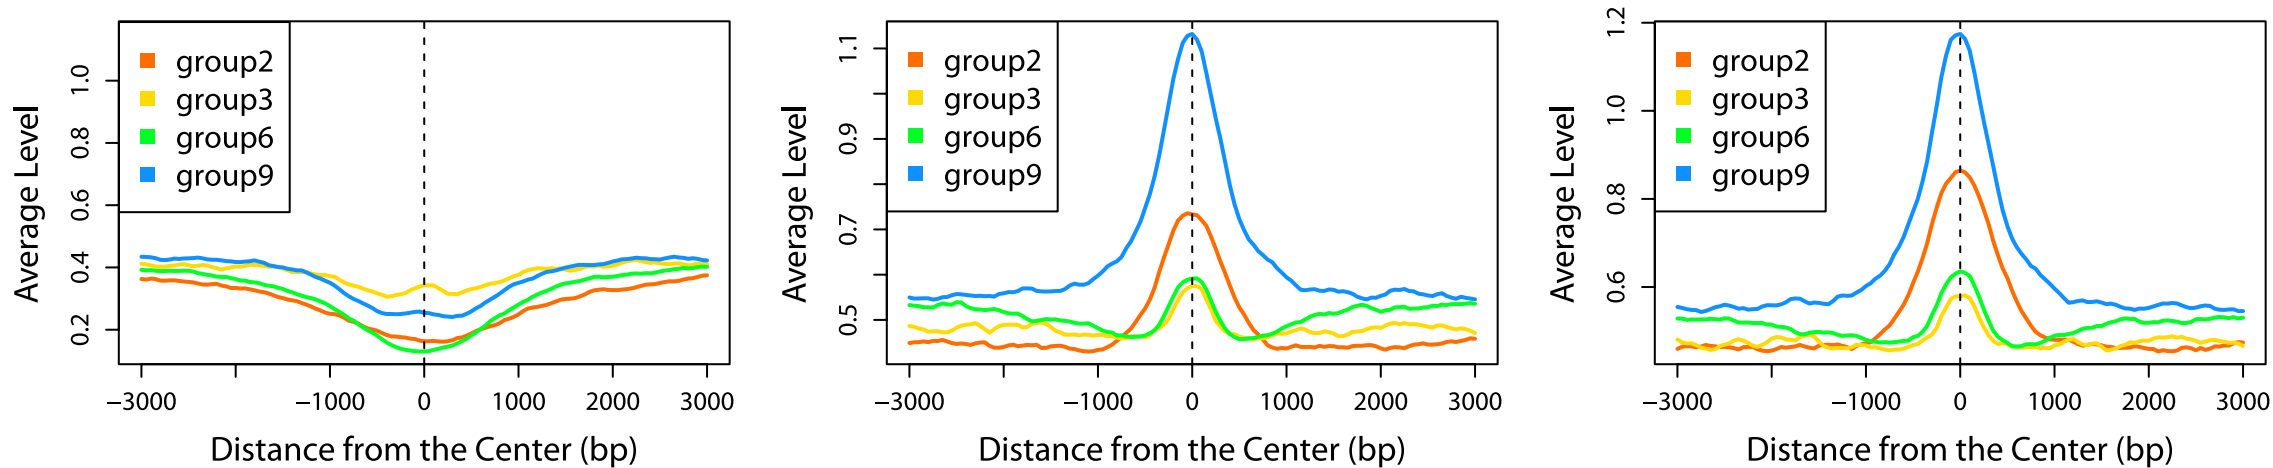

D

 $^u$ CpG (MRE) around the center of predicted enhancer Sites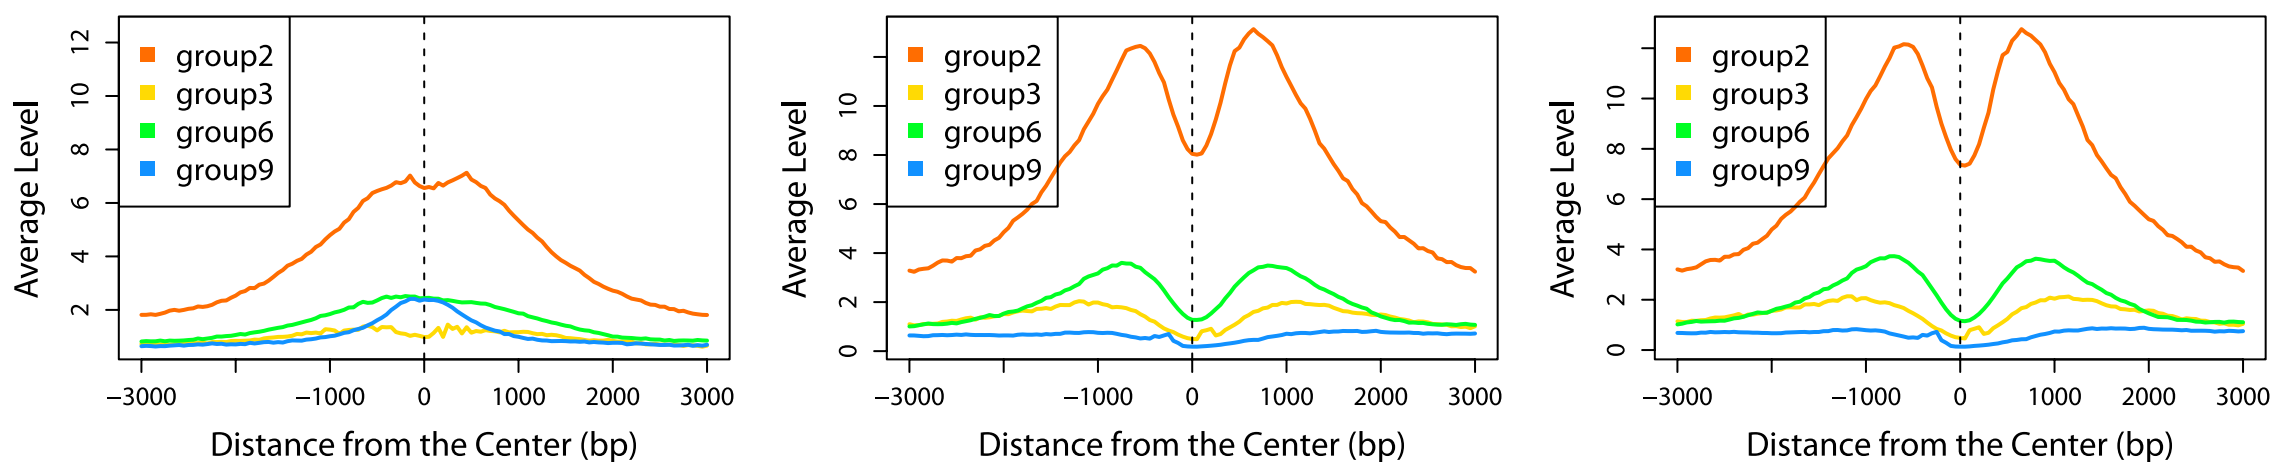

Supplement: Figure_S12.pdf [file Figure_S12.pdf]
