# Supplementary figures and images for: Spatiotemporal clustering of the epigenome reveals rules of dynamic gene regulation
Source: HighWire-hosted journal article supplement (doi:10.1101/gr.144949.112), 2012-10-02

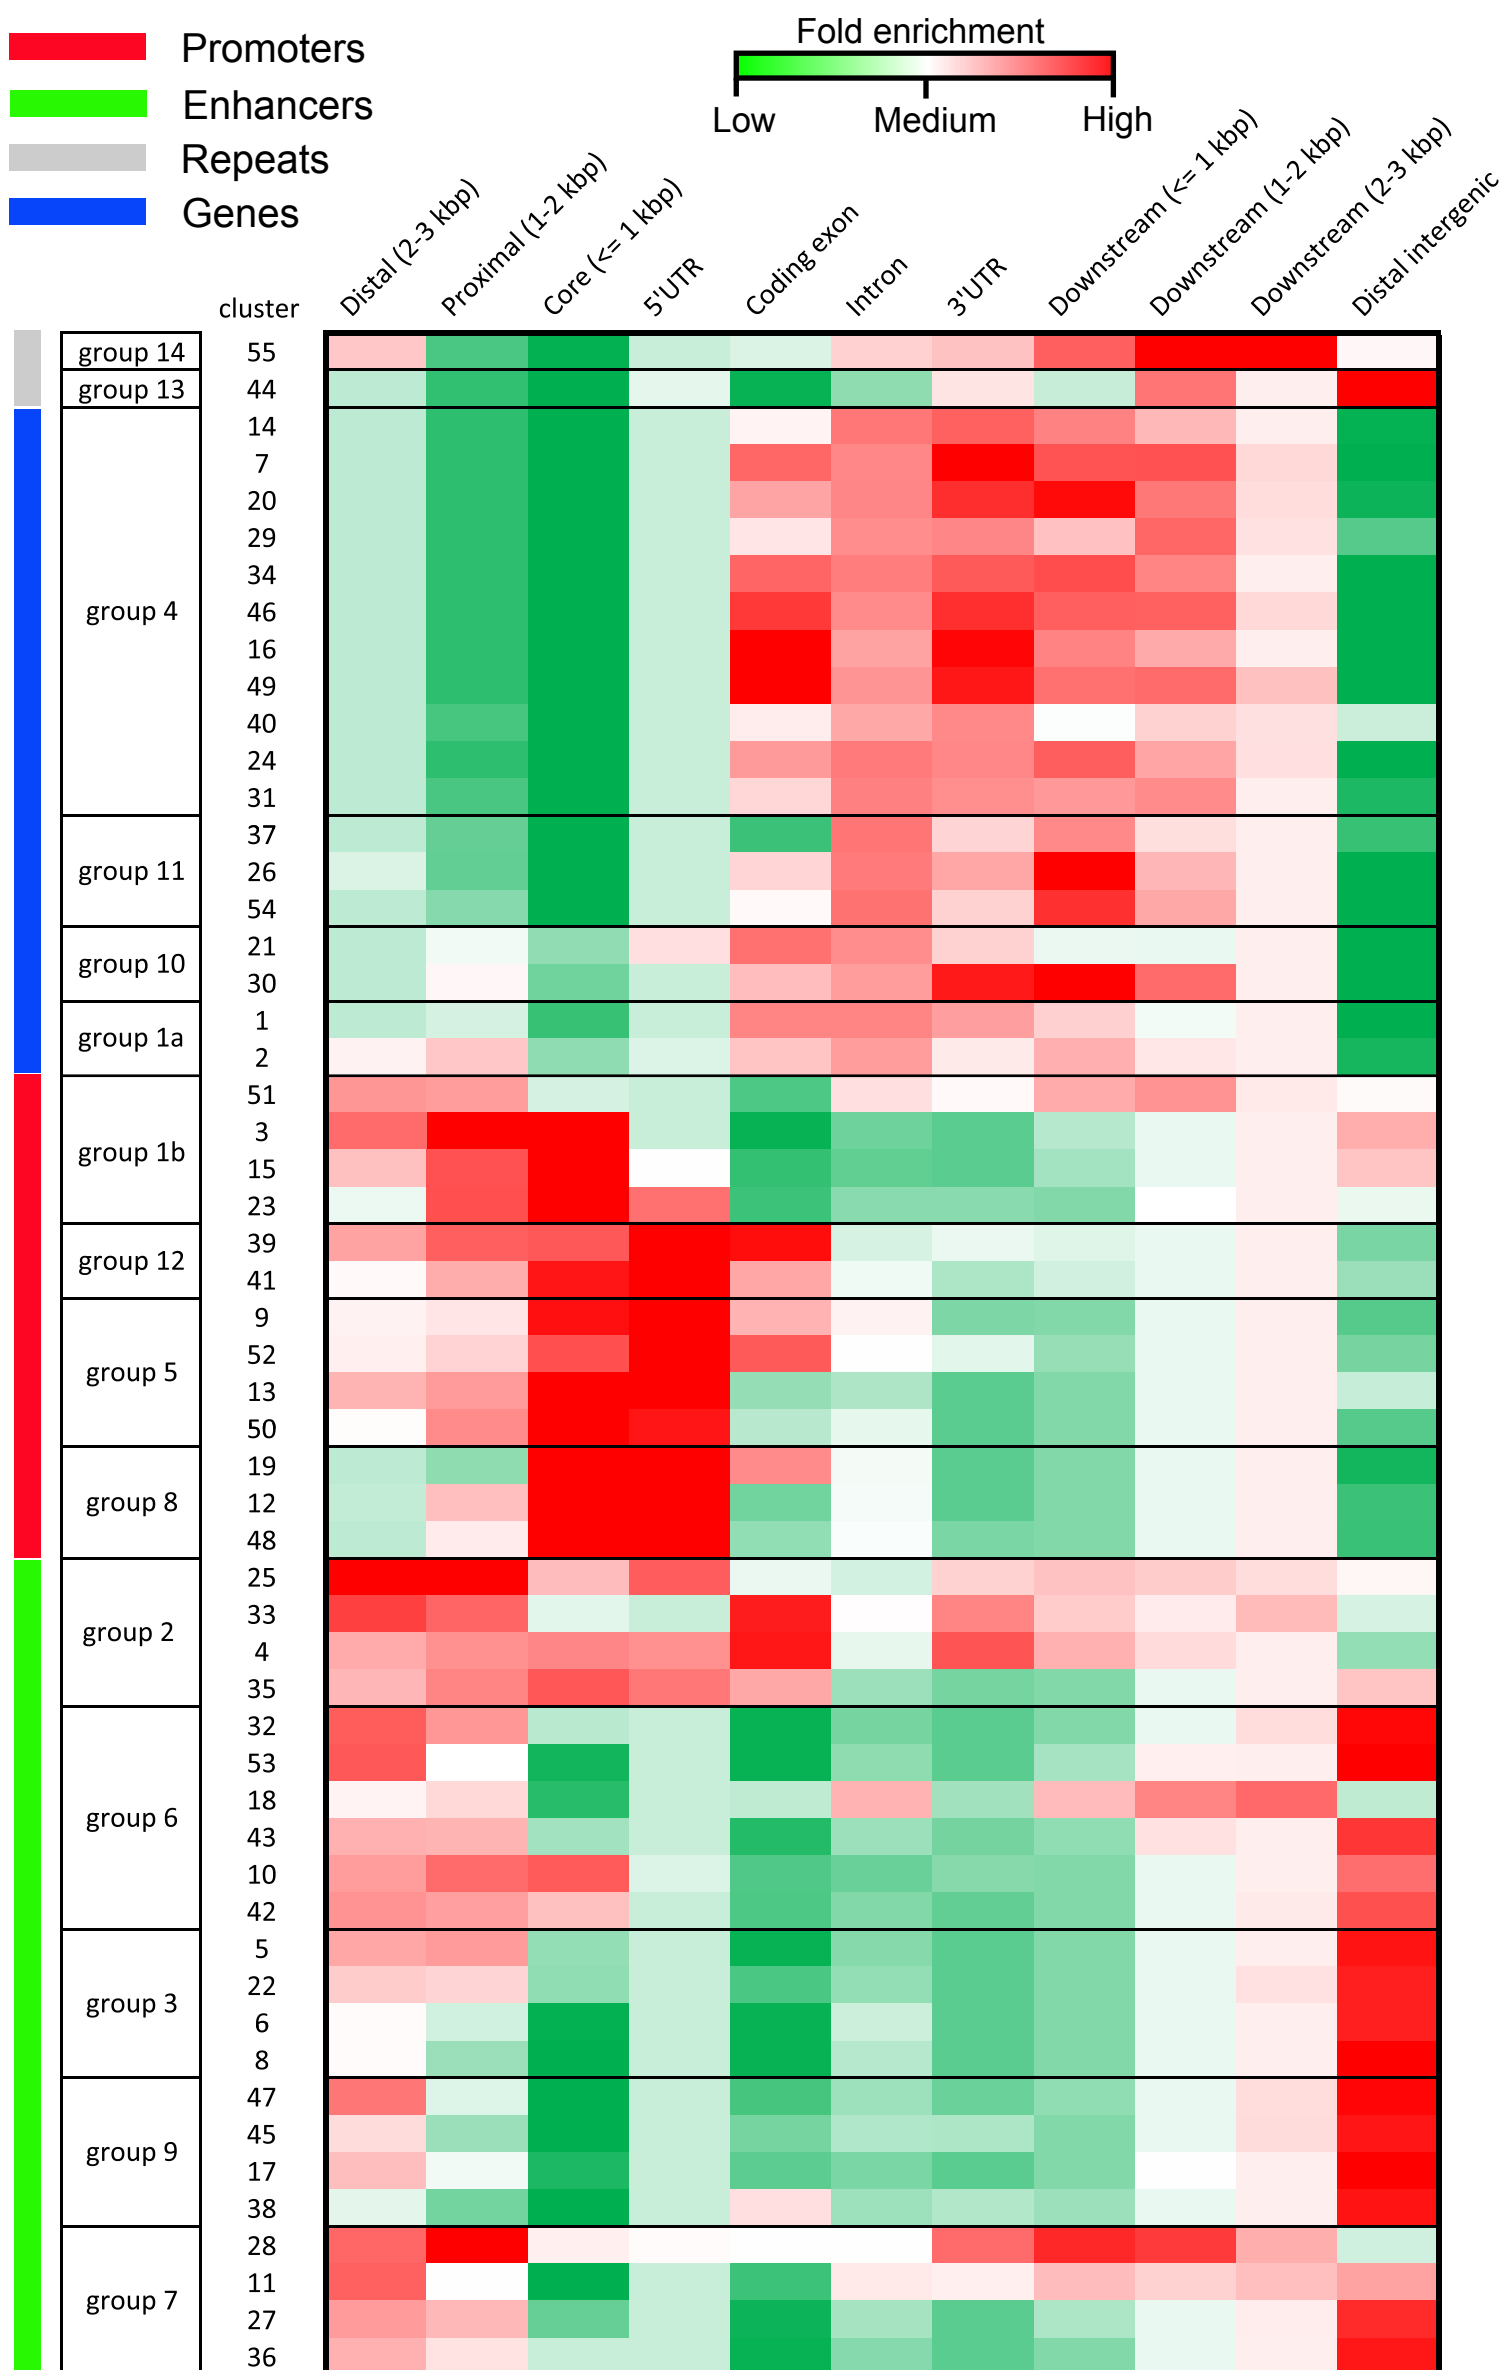

Supplement: Figure_S4.pdf [file Figure_S4.pdf]

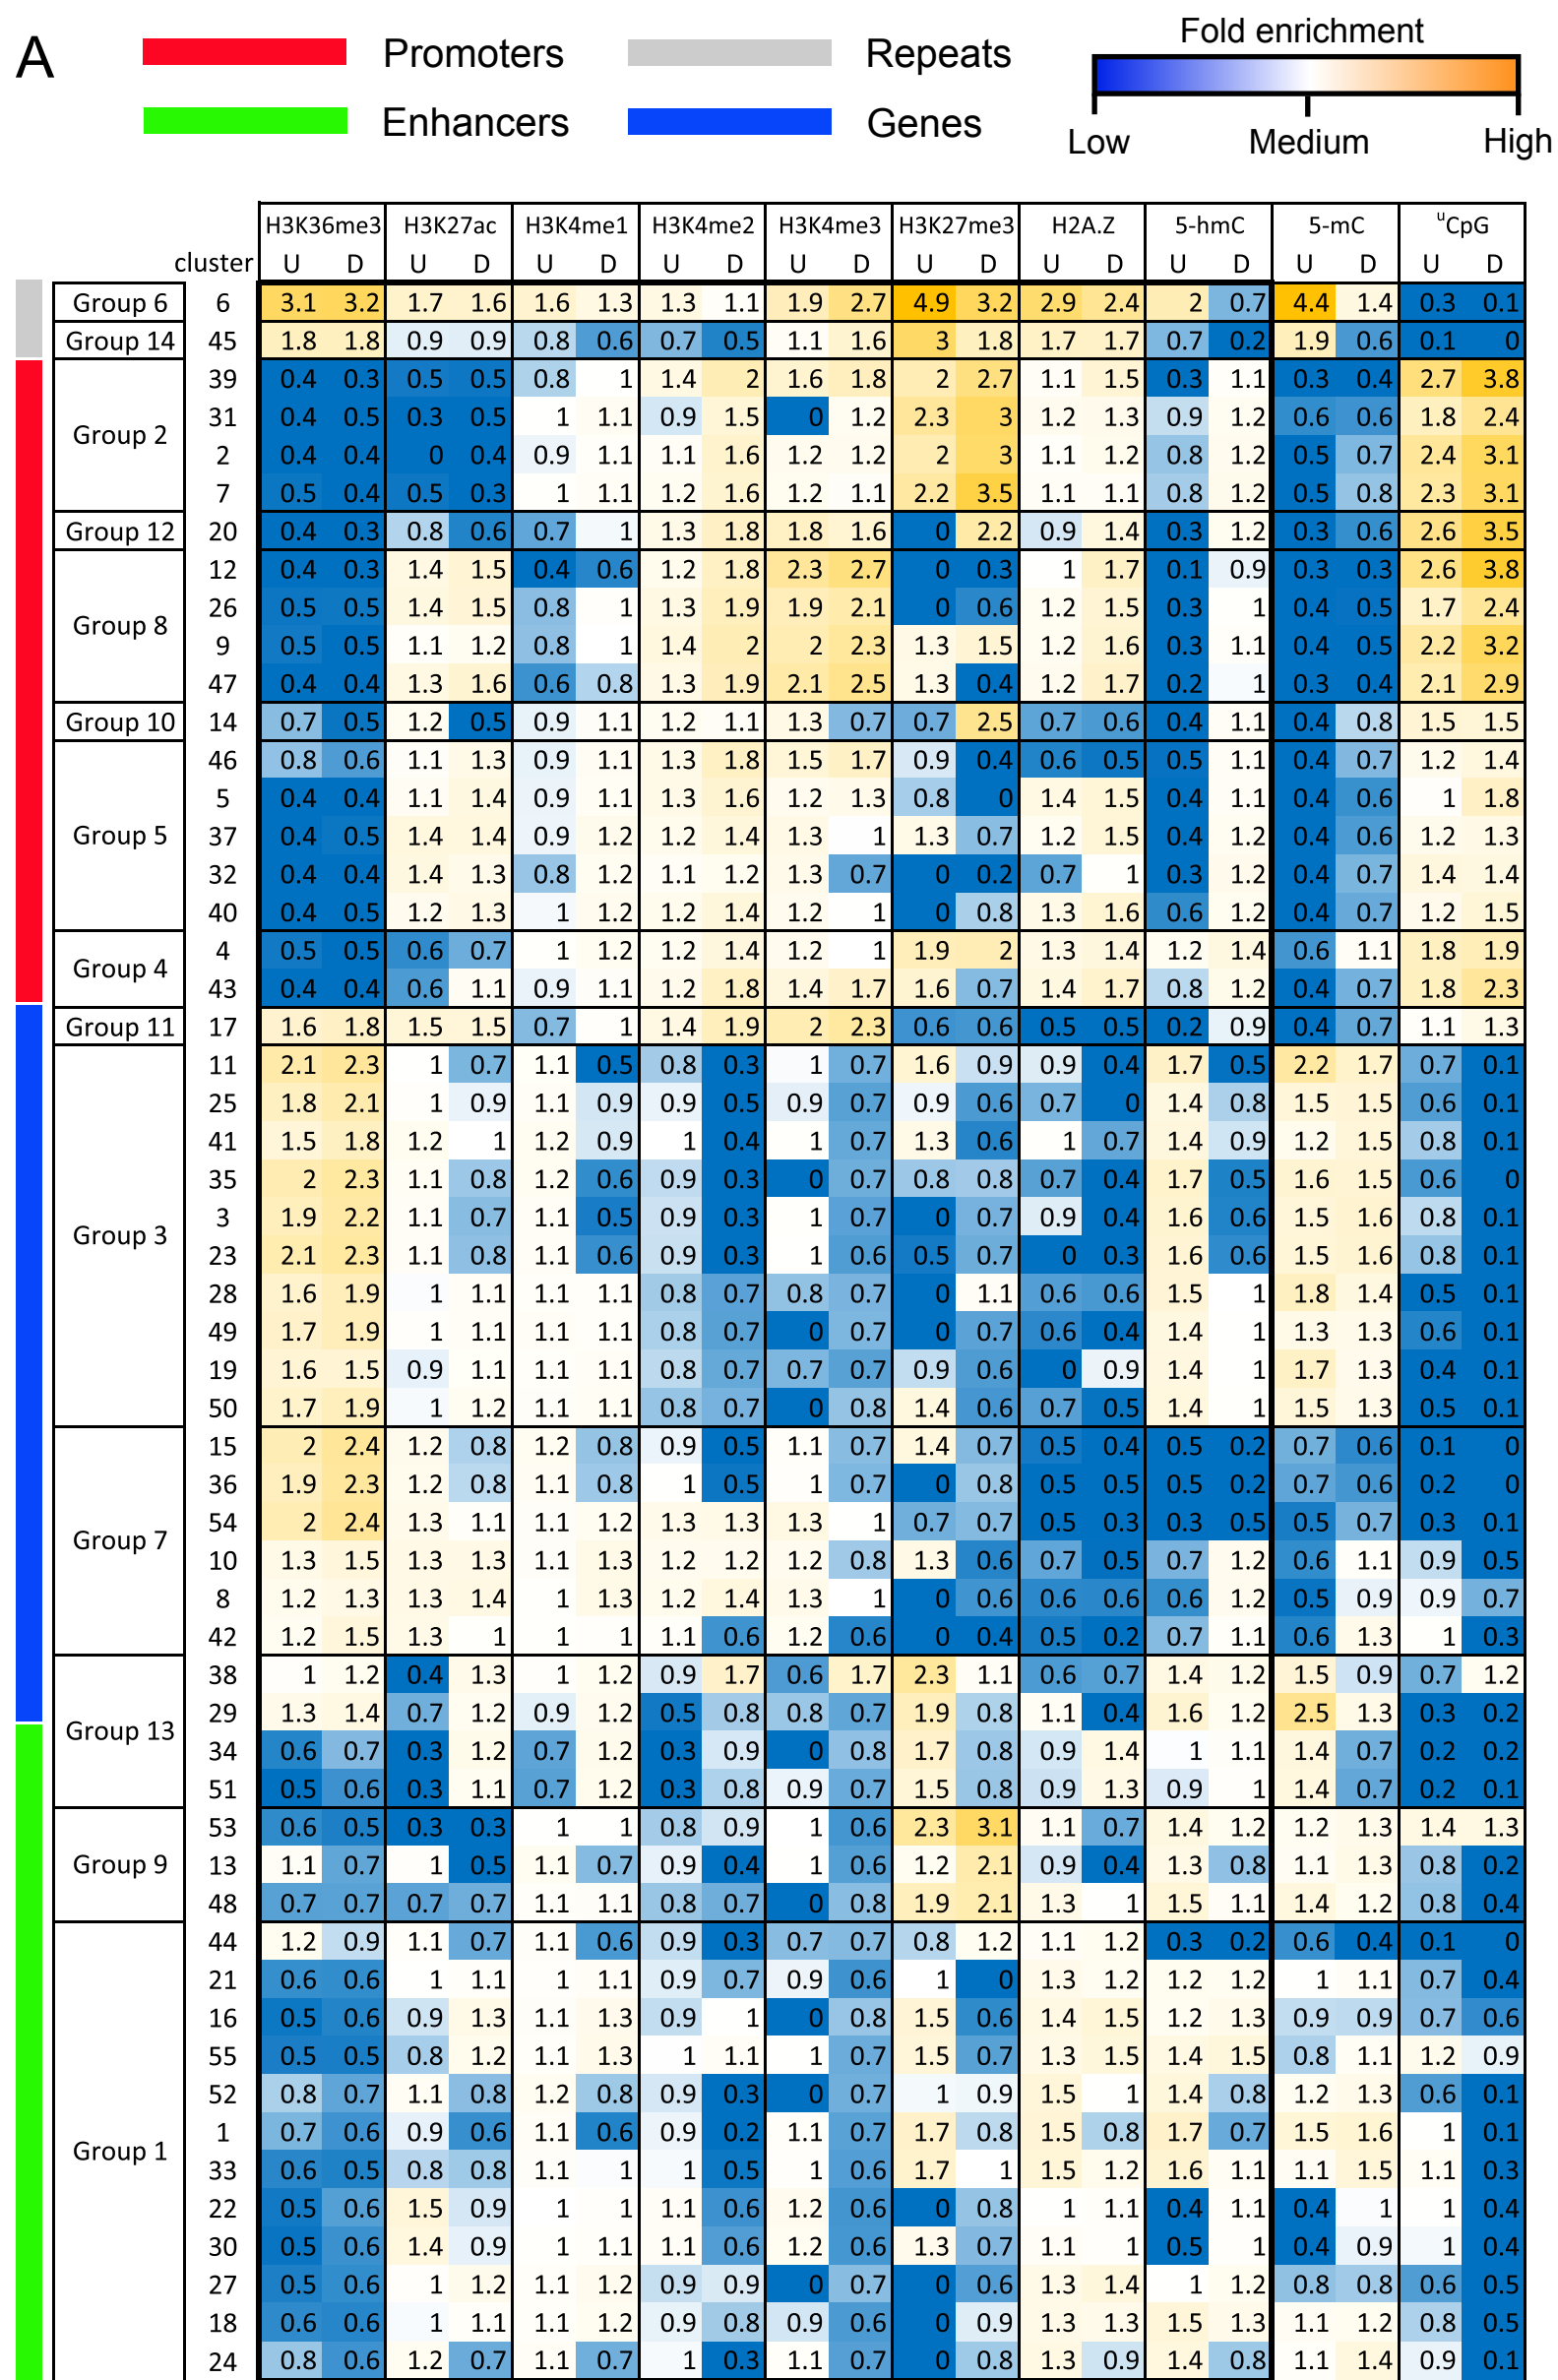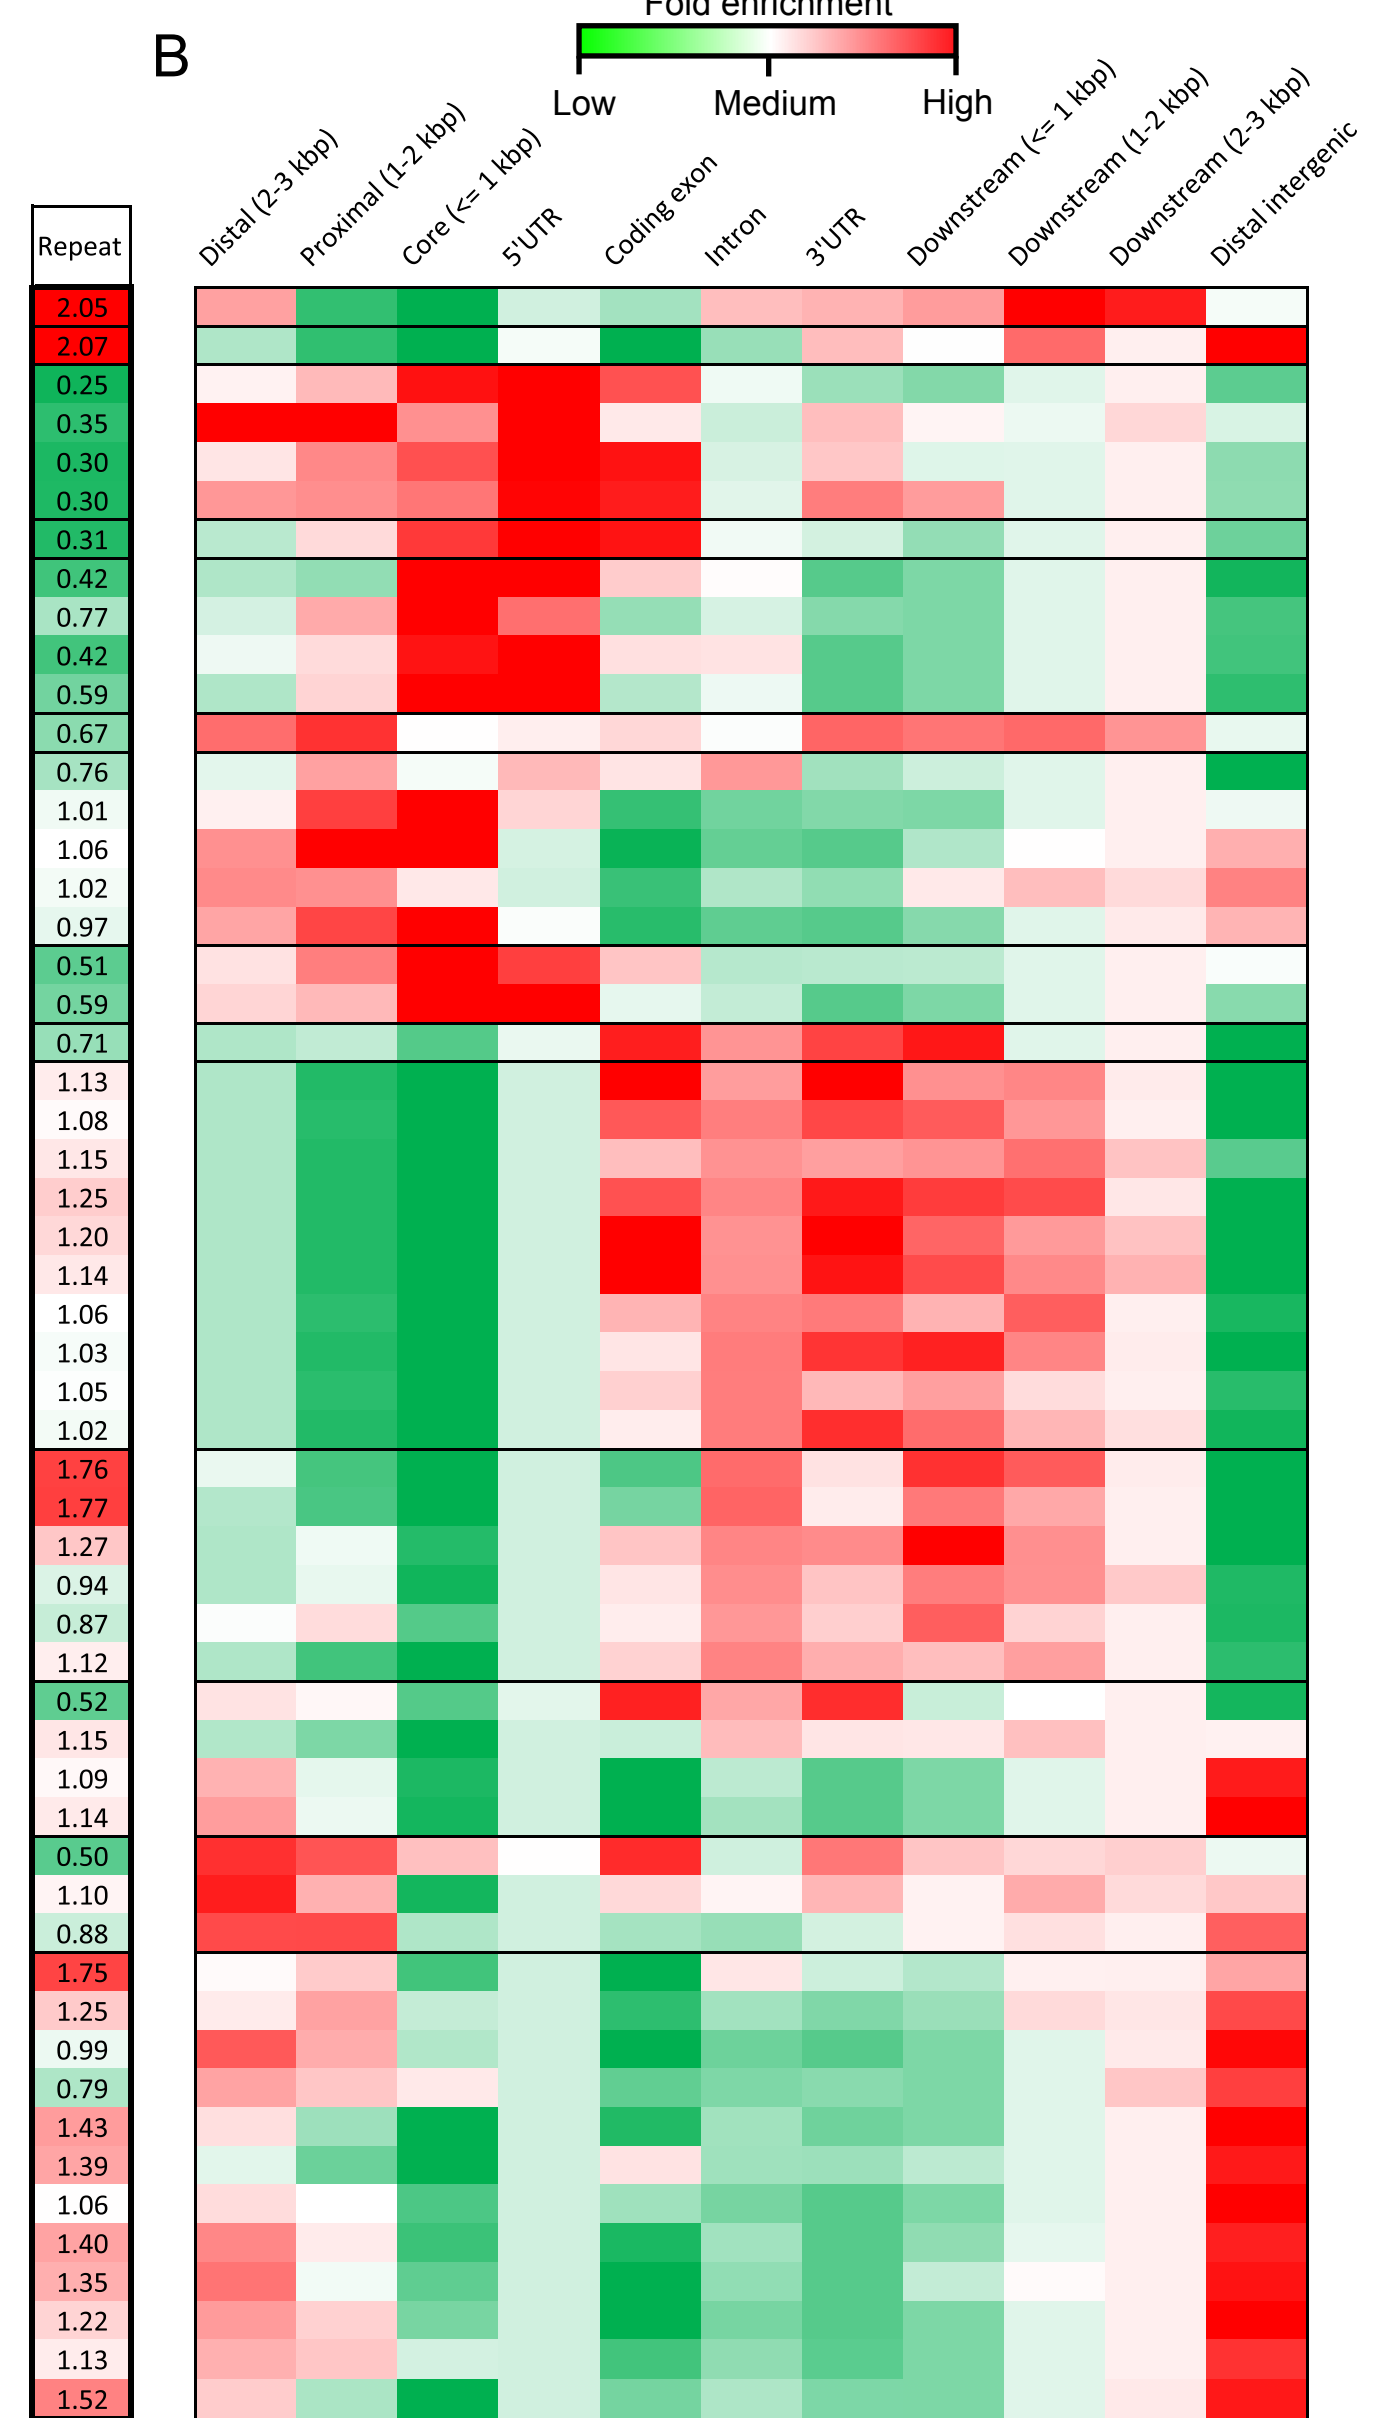

Supplement: Figure_S5.pdf [file Figure_S5.pdf]

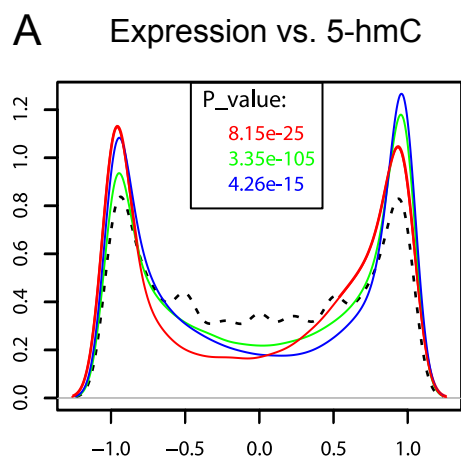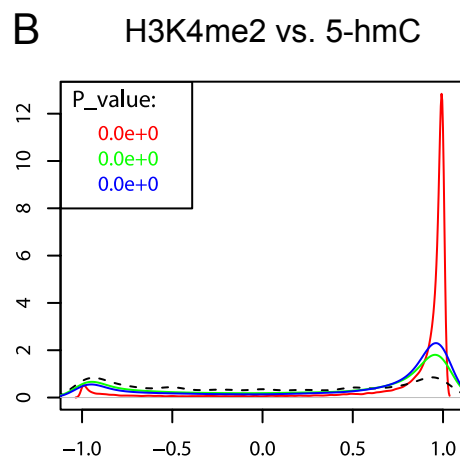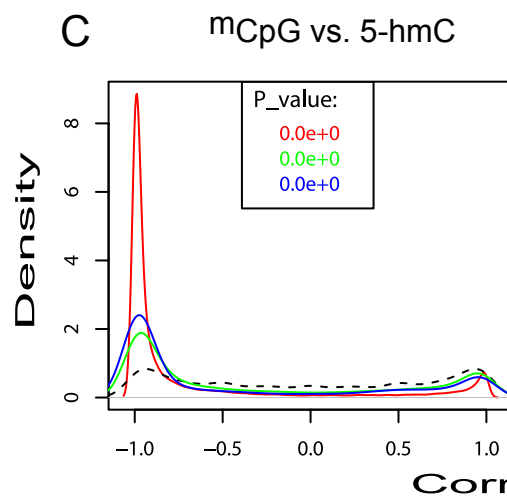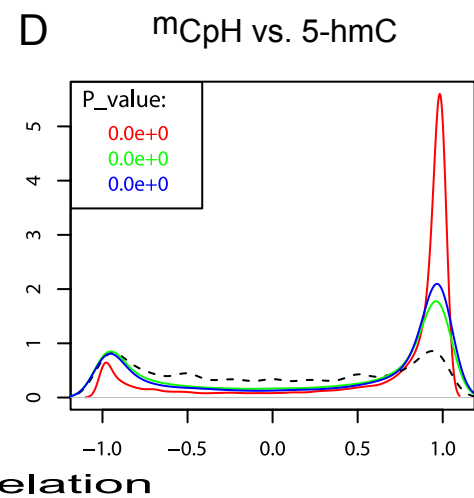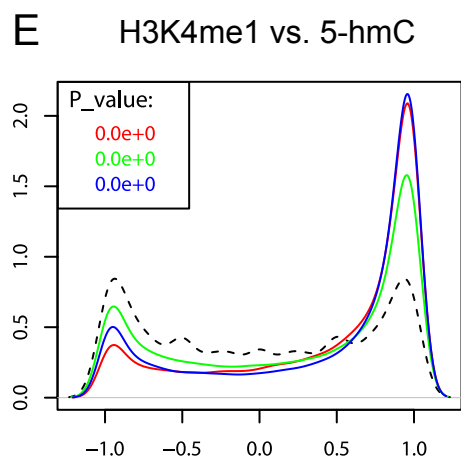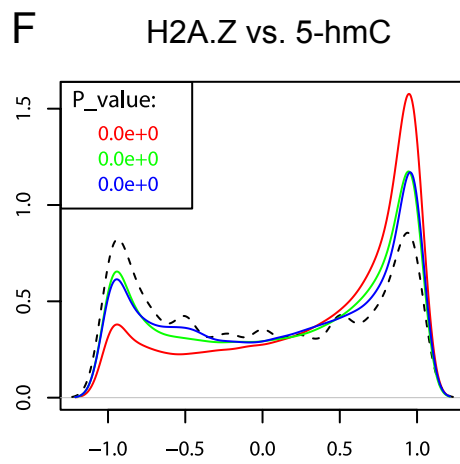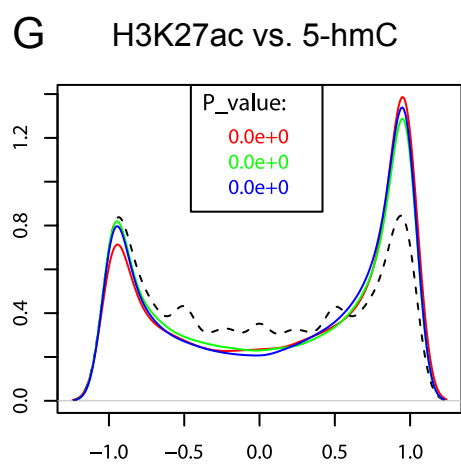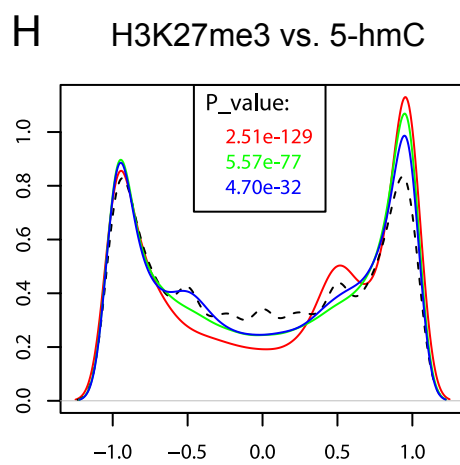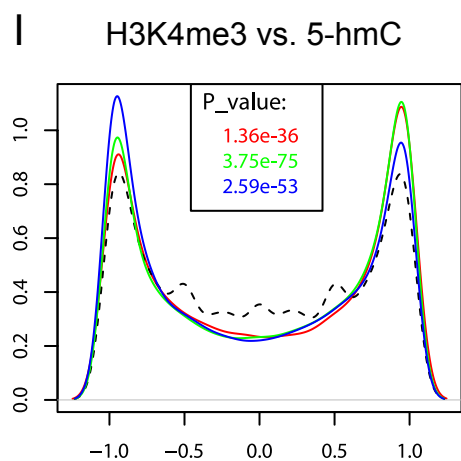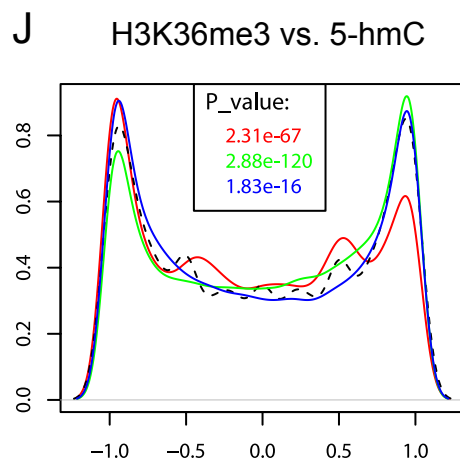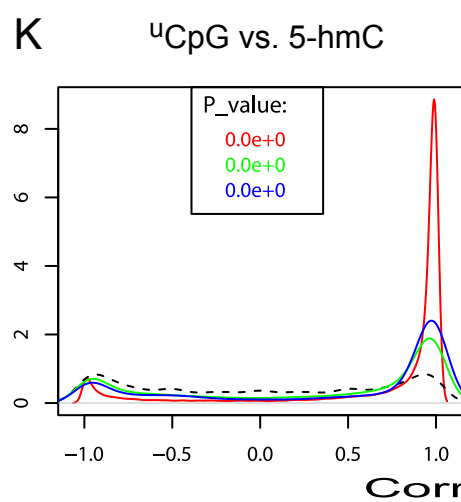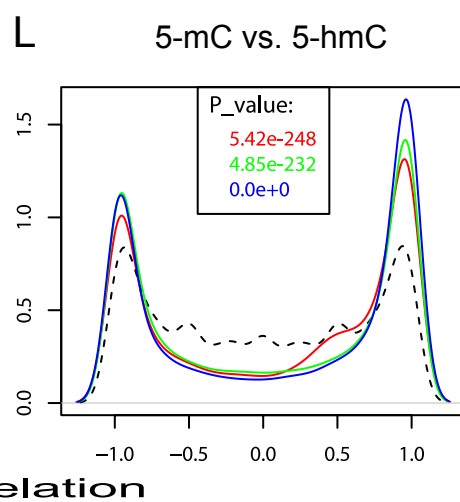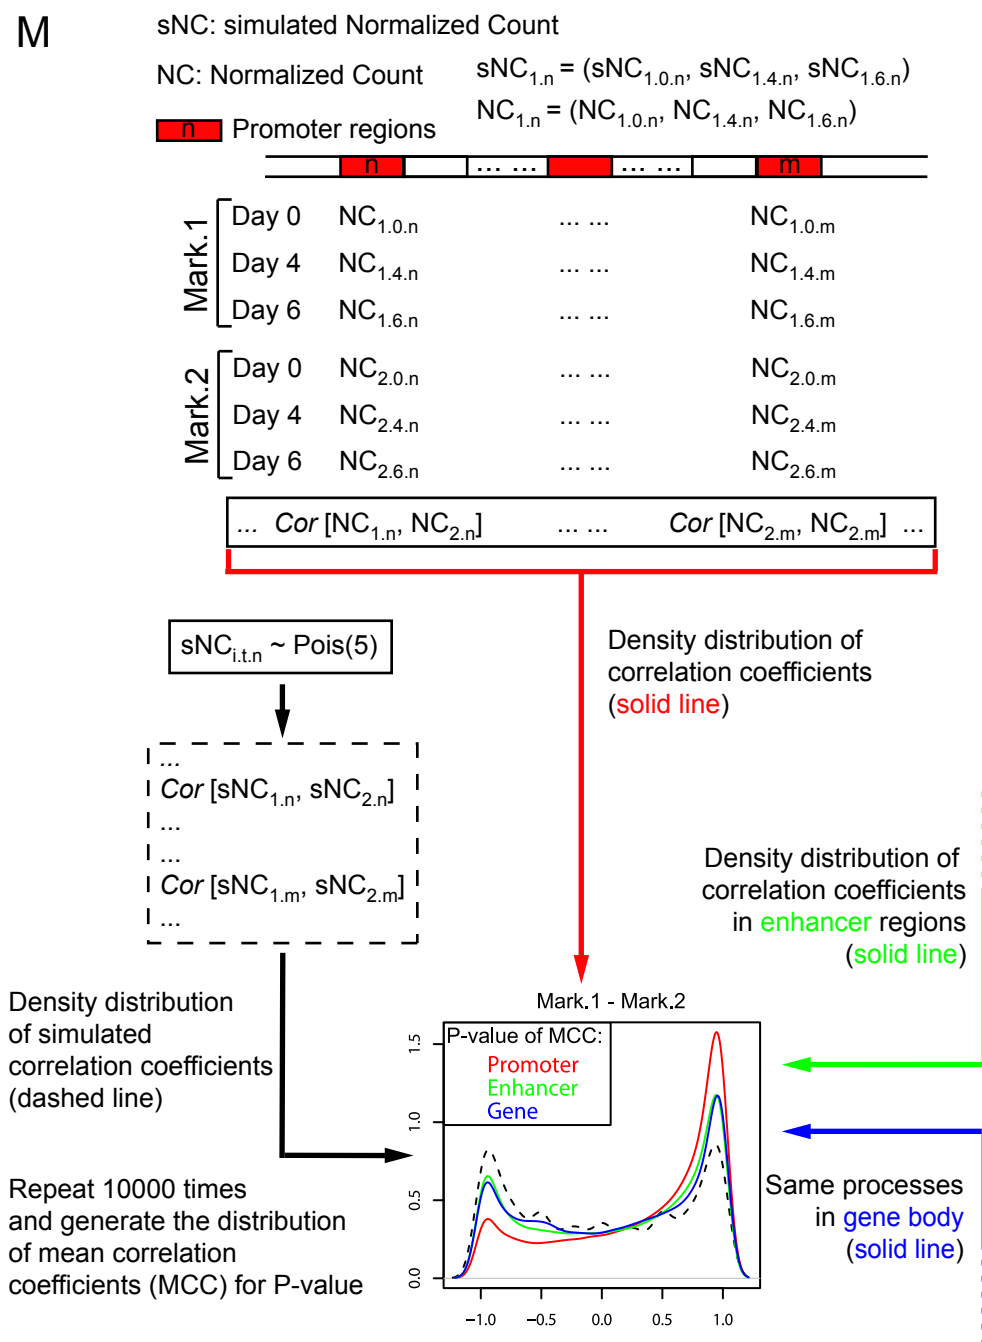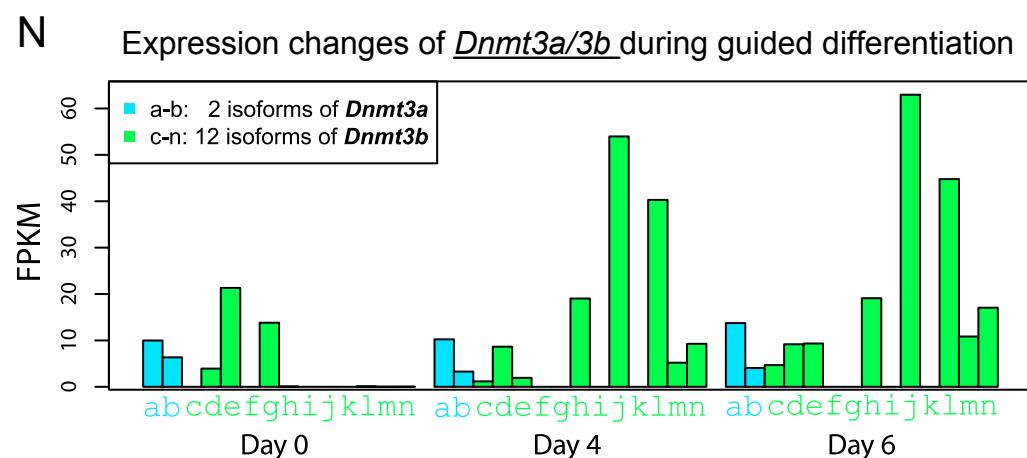

Supplement: Figure_S9.pdf [file Figure_S9.pdf]
